# Supplementary material for: Identification of Novel Human IgE-Binding Peptides from a Phage Display Library for Total IgE Detection
Source: Research Square preprint supplement (doi:10.21203/rs.3.rs-6100980/v1), 2025-03-26
Supplement: Supplementary file 1 [file 03d8116d90a86bdbf623b3c0.docx]

**Supplementary Information**

**Identification of Novel Human IgE-Binding Peptides from a Phage Display Library for Total IgE Detection**

Sudtida Kaew-amdee, Manlika Makornwattana, Ratthaphol Charlermroj*

**Addresses:**

National Center for Genetic Engineering and Biotechnology (BIOTEC),

National Science and Technology Development Agency (NSTDA),

111 Thailand Science Park, Phahonyothin Road, Pathum Thani 12120, THAILAND

***Corresponding author:**

Ratthaphol Charlermroj, PhD. Advanced Diagnostics and Biomarker Discovery Research Team

Tel +66 2 5646700, E-mail: [ratthaphol.cha@biotec.or.th](mailto:ratthaphol.cha@biotec.or.th)

**Table S1**. DNA sequence of all phage clones.

| **Phage clones** | **DNA sequence** | **Peptide sequence**  **(12-mer)** |
| --- | --- | --- |
| clone1 | AATACTAGTAGGCTTCCGAATTATGAGTTGTTGCAT | NTSRLPNYELLH |
| clone2 | GTTGTTGGGCGTGCTATGGCTTATAGTACGATTCCT | VVGRAMAYSTIP |
| clone3 | AATACTAGTAGGCTTCCGAATTATGAGTTGTTGCAT | NTSRLPNYELLH |
| clone4 | AATACTAGTAGGCTTCCGAATTATGAGTTGTTGCAT | NTSRLPNYELLH |
| clone5 | GTTCCTGTGACTCATAGTCCGTATAGTTTTAATGCG | VPVTHSPYSFNA |
| clone6 | CTGCATGCTGCGAATTCGAGTCGTAATTTGGGTGCT | LHAANSSRNLGA |
| clone7 | CTGCATGCTGCGAATTCGAGTCGTAATTTGGGTGCT | LHAANSSRNLGA |
| clone8 | AGTCCTTATCATGATCCTCATTATACTGATAAGTTT | SPYHDPHYTDKF |
| clone9 | GCGGCTGAGTATTTTGCGACGTGGGAGCCTATGGCT | AAEYFATWEPMA |
| clone10 | TGGCATGTGCATCCTCTTACTAGTAGGTATTTGAGG | WHVHPLTSRYLR |
| clone11 | ACGTTGGATGCGCATTTGCATAAGCTGTGGAATTTT | TLDAHLHKLWNF |
| clone12 | TATCATGTGGGTCCTGATATTTTTCTGAGTGCTGTG | YHVGPDIFLSAV |
| clone13 | GGTTATCCTTGTCTGAATCATAGGTGGAATCTTTGT | GYPCLNHRWNLC |
| clone14 | GGTGAGTTGTTGACTCGTTATAATAGGCTTAGTGTT | GELLTRYNRLSV |
| clone15 | CTTTTGCCGCATCTTCATTCGCTTAATACGTATACT | LLPHLHSLNTYT |
| clone16 | TGGACGTGGCCGTCGAATGATTCGCATATTTGTCAT | WTWPSNDSHICH |

**Table S2**. Biotin-PLL-Peptide conjugation test using direct ELISA

| **Sample coated well** | **Peptide (12-mer)** | **A450** | | |
| --- | --- | --- | --- | --- |
| **Replicate 1** | **Replicate 2** | **Average** |
| Biotin-PLL-Peptide 1 | NTSRLPNYELLH | 1.163 | 1.261 | 1.212 |
| Biotin-PLL-Peptide 2 | VVGRAMAYSTIP | 0.502 | 0.524 | 0.513 |
| Biotin-PLL-Peptide 3 | VPVTHSPYSFNA | 1.403 | 1.404 | 1.404 |
| Biotin-PLL-Peptide 4 | AAEYFATWEPMA | 2.001 | 2.048 | 2.024 |
| Biotin-PLL-Peptide 5 | WHVHPLTSRYLR | 0.057 | 0.075 | 0.066 |
| Biotin-PLL-Peptide 6 | GYPCLNHRWNLC | 0.096 | 0.095 | 0.096 |
| Biotin-PLL | | 3.383 | 3.332 | 3.358 |
| Biotin-labeled goat-anti-mouse | | 3.466 | 3.335 | 3.401 |
| Coating buffer (NaHCO3, pH 9.6) | | 0.050 | 0.042 | 0.046 |

**Note:** Red text indicates negative results when using two times the background (coating buffer)


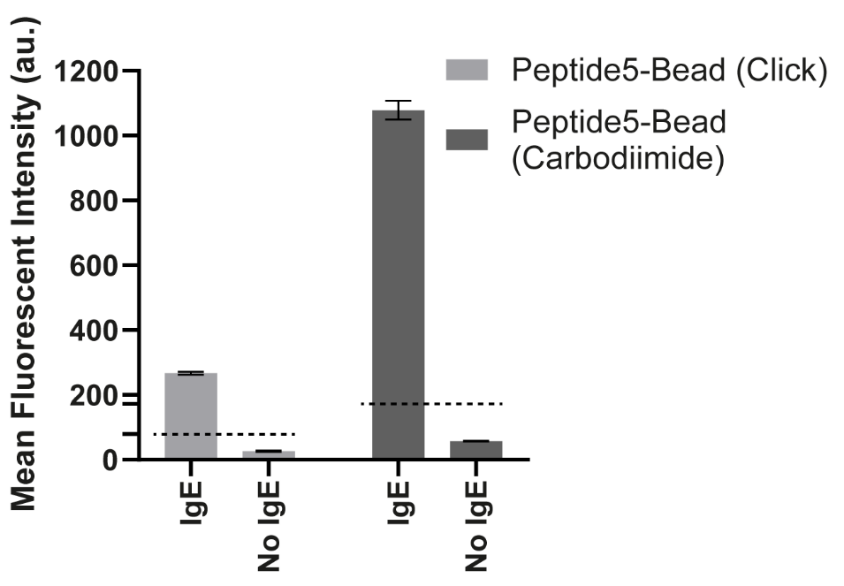


**Figure S1.** Comparison of peptide bead conjugation using two methods: Click chemistry reaction and carbodiimide reaction, with Peptide 5 as a model. Both methods were tested with human IgE and without the addition of IgE antibody. The dotted lines represent the cut-off value, defined as three times the background value (no addition IgE).
